# APA Publishing Audio Books

## Listen anytime, anywhere

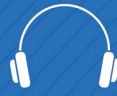

Purchase and listen at [appi.org](http://appi.org)

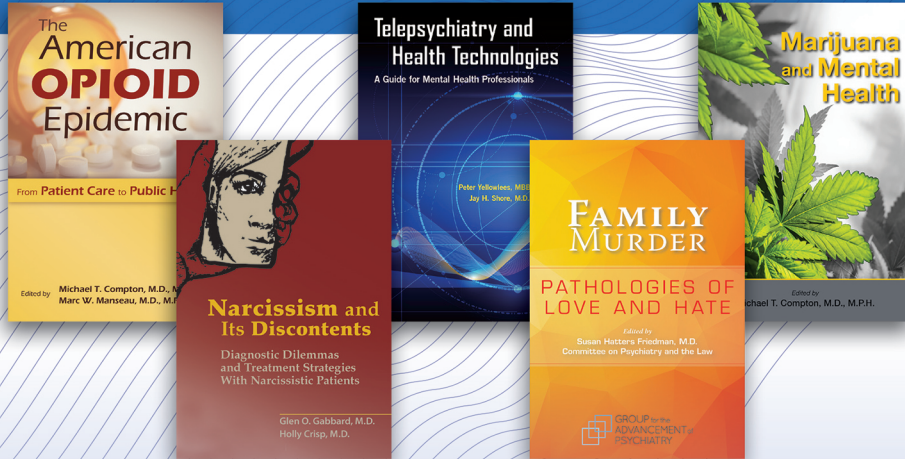

AMERICAN PSYCHIATRIC ASSOCIATION PUBLISHING  
[www.appi.org](http://www.appi.org)  
 Email: [appi@psych.org](mailto:appi@psych.org)  
 Toll-Free: 1-800-368-5777

Also available at: Google Podcasts, Apple Podcasts, Spotify, Stitcher, and YouTube

| PS Form 3526 Statement of Ownership, Management, and Circulation (All Periodicals Publications Except Requester Publications)                                                                                                                                                                                                                                                                                                                                                                                                                                           |                                                |                                                             |                                                               |
|-------------------------------------------------------------------------------------------------------------------------------------------------------------------------------------------------------------------------------------------------------------------------------------------------------------------------------------------------------------------------------------------------------------------------------------------------------------------------------------------------------------------------------------------------------------------------|------------------------------------------------|-------------------------------------------------------------|---------------------------------------------------------------|
| 1. Publication Title<br>AMERICAN PSYCHIATRIC ASSOCIATION/JOURNAL OF NEUROPSYCHIATRY AND CLINICAL NEUROSCIENCES (THE)                                                                                                                                                                                                                                                                                                                                                                                                                                                    | 2. Publication Number<br>4241                  | ISSN<br>8950172                                             | 3. Filing Date<br>09/15/2022                                  |
| 4. Issue Frequency<br>QUARTERLY                                                                                                                                                                                                                                                                                                                                                                                                                                                                                                                                         | 5. Number of Issues Published Annually<br>4    | 6. Annual Subscription Price<br>\$ 323.00                   |                                                               |
| 7. Complete Mailing Address of Known Office of Publication<br>1000 WILSON BLVD STE 1825<br>ARLINGTON, ARLINGTON, VA 22209-3924                                                                                                                                                                                                                                                                                                                                                                                                                                          |                                                |                                                             | Contact Person<br>ROGER DOMRAS<br>Telephone<br>(703) 907-8544 |
| 8. Complete Mailing Address of Headquarters or General Business Office of Publisher<br>800 Maine Ave, SW<br>Site 900<br>Washington, DC 20024-2812                                                                                                                                                                                                                                                                                                                                                                                                                       |                                                |                                                             |                                                               |
| 9. Full Names and Complete Mailing Addresses of Publisher, Editor, and Managing Editor                                                                                                                                                                                                                                                                                                                                                                                                                                                                                  |                                                |                                                             |                                                               |
| Publisher (Name and complete mailing address)<br>Patrick Hansard<br>800 Maine Ave, SW<br>Site 900<br>Washington, DC 20024-2812                                                                                                                                                                                                                                                                                                                                                                                                                                          |                                                |                                                             |                                                               |
| Editor (Name and complete mailing address)<br>David Aroniegas<br>800 Maine Ave, SW<br>Site 900<br>Washington, DC 20024-2812                                                                                                                                                                                                                                                                                                                                                                                                                                             |                                                |                                                             |                                                               |
| Managing Editor (Name and complete mailing address)<br>Damaris Jackson<br>800 Maine Ave, SW<br>Site 900<br>Washington, DC 20024-2812                                                                                                                                                                                                                                                                                                                                                                                                                                    |                                                |                                                             |                                                               |
| 10. Owner (Do not leave blank. If the publication is owned by a corporation, give the name and address of the corporation immediately followed by the names and addresses of all stockholders owning or holding 1 percent or more of the total amount of stock. If not owned by a corporation, give names and addresses of the individual owners. If owned by a partnership or other unincorporated firm, give its name and address as well as those of each individual owner. If the publication is published by a nonprofit organization, give its name and address.) |                                                |                                                             |                                                               |
| Full Name                                                                                                                                                                                                                                                                                                                                                                                                                                                                                                                                                               | Complete Mailing Address                       |                                                             |                                                               |
| American Psychiatric Associati                                                                                                                                                                                                                                                                                                                                                                                                                                                                                                                                          | 800 Maine Ave., S.W., Suite 900, WA 20024-2812 |                                                             |                                                               |
| 11. Known Bondholders, Mortgagees, and Other Security Holders Owning or Holding 1 Percent or More of Total Amount of Bonds, Mortgages, or Other Securities. If none, check box <input checked="" type="checkbox"/> None                                                                                                                                                                                                                                                                                                                                                 |                                                |                                                             |                                                               |
| Full Name                                                                                                                                                                                                                                                                                                                                                                                                                                                                                                                                                               | Complete Mailing Address                       |                                                             |                                                               |
| 12. Tax Status (For completion by nonprofit organizations authorized to mail at nonprofit rates)<br>The purpose, function, and nonprofit status of this organization and the exempt status for federal income tax purposes:<br><input checked="" type="checkbox"/> Has Not Changed During Preceding 12 Months<br><input type="checkbox"/> Has Changed During Preceding 12 Months (Publisher must submit explanation of change with this statement)                                                                                                                      |                                                |                                                             |                                                               |
| 13. Publication Title<br>AMERICAN PSYCHIATRIC ASSOCIATION/JOURNAL OF NEUROPSYCHIATRY AND CLINICAL NEUROSCIENCES (THE)                                                                                                                                                                                                                                                                                                                                                                                                                                                   |                                                |                                                             |                                                               |
| 14. Issue Date for Circulation Data Below<br>07/01/2022                                                                                                                                                                                                                                                                                                                                                                                                                                                                                                                 |                                                | Average No. Copies Each Issue During Preceding 12 Months    |                                                               |
| 15. Extend and Nature of Circulation                                                                                                                                                                                                                                                                                                                                                                                                                                                                                                                                    |                                                | No. Copies of Single Issue Published Nearest to Filing Date |                                                               |
| a. Total Numbers of Copies (Net press run)                                                                                                                                                                                                                                                                                                                                                                                                                                                                                                                              |                                                | 686                                                         |                                                               |
| b. Paid Circulation (By Mail and Outside the Mail)                                                                                                                                                                                                                                                                                                                                                                                                                                                                                                                      |                                                | 391                                                         |                                                               |
| (1) Mailed Outside County Paid Subscriptions Stated on PS Form 3541 (include paid distribution above nominal rate, advertiser's proof copies, and exchange copies)                                                                                                                                                                                                                                                                                                                                                                                                      |                                                | 419                                                         |                                                               |
| (2) Mailed In-County Paid Subscriptions Stated on PS Form 3541 (include paid distribution above nominal rate, advertiser's proof copies, and exchange copies)                                                                                                                                                                                                                                                                                                                                                                                                           |                                                | 0                                                           |                                                               |
| (3) Paid Distribution Outside the Mails Including Sales Through Dealers and Carriers, Street Vendors, Counter Sales, and Other Paid Distribution Outside USPS                                                                                                                                                                                                                                                                                                                                                                                                           |                                                | 0                                                           |                                                               |
| (4) Paid Distribution by Other Classes of Mail Through the USPS (e.g. First-Class Mail)                                                                                                                                                                                                                                                                                                                                                                                                                                                                                 |                                                | 0                                                           |                                                               |
| c. Total Paid Distribution (Sum of 15b (1), (2), (3), (4))                                                                                                                                                                                                                                                                                                                                                                                                                                                                                                              |                                                | 391                                                         |                                                               |
| d. Free or Nominal Rate Distribution (By Mail and Outside the Mail)                                                                                                                                                                                                                                                                                                                                                                                                                                                                                                     |                                                | 80                                                          |                                                               |
| (1) Free or Nominal Rate Outside County Copies included on PS Form 3541                                                                                                                                                                                                                                                                                                                                                                                                                                                                                                 |                                                | 0                                                           |                                                               |
| (2) Free or Nominal Rate In-County Copies included on PS Form 3541                                                                                                                                                                                                                                                                                                                                                                                                                                                                                                      |                                                | 0                                                           |                                                               |
| (3) Free or Nominal Rate Copies Mailed at Other Classes Through the USPS (e.g. First-Class Mail)                                                                                                                                                                                                                                                                                                                                                                                                                                                                        |                                                | 0                                                           |                                                               |
| (4) Free or Nominal Rate Distribution Outside the Mail (Carriers or other means)                                                                                                                                                                                                                                                                                                                                                                                                                                                                                        |                                                | 25                                                          |                                                               |
| e. Total Free or Nominal Rate Distribution (Sum of 15d (1), (2), (3), (4))                                                                                                                                                                                                                                                                                                                                                                                                                                                                                              |                                                | 80                                                          |                                                               |
| f. Total Distribution (Sum of 15c and 15e)                                                                                                                                                                                                                                                                                                                                                                                                                                                                                                                              |                                                | 471                                                         |                                                               |
| g. Copies not Distributed                                                                                                                                                                                                                                                                                                                                                                                                                                                                                                                                               |                                                | 0                                                           |                                                               |
| h. Total (Sum of 15f and 15g)                                                                                                                                                                                                                                                                                                                                                                                                                                                                                                                                           |                                                | 471                                                         |                                                               |
| i. Percent Paid (15c / 15f times 100)                                                                                                                                                                                                                                                                                                                                                                                                                                                                                                                                   |                                                | 83.01 %                                                     |                                                               |
| j. Percent Paid (15c / 15f times 100)                                                                                                                                                                                                                                                                                                                                                                                                                                                                                                                                   |                                                | 94.37 %                                                     |                                                               |
| 16. If total circulation includes electronic copies, report that circulation on lines below.                                                                                                                                                                                                                                                                                                                                                                                                                                                                            |                                                |                                                             |                                                               |
| a. Paid Electronic Copies                                                                                                                                                                                                                                                                                                                                                                                                                                                                                                                                               |                                                | 0                                                           |                                                               |
| b. Total Paid Print Copies (Line 15c) + Paid Electronic Copies                                                                                                                                                                                                                                                                                                                                                                                                                                                                                                          |                                                | 0                                                           |                                                               |
| c. Total Print Distribution (Line 15f) + Paid Electronic Copies                                                                                                                                                                                                                                                                                                                                                                                                                                                                                                         |                                                | 0                                                           |                                                               |
| d. Percent Paid (Both Print and Electronic Copies)                                                                                                                                                                                                                                                                                                                                                                                                                                                                                                                      |                                                | 0.00 %                                                      |                                                               |
| <input type="checkbox"/> I certify that 50% of all my distributed copies (Electronic and Print) are paid above a nominal price.                                                                                                                                                                                                                                                                                                                                                                                                                                         |                                                |                                                             |                                                               |
| 17. Publication of Statement of Ownership<br><input checked="" type="checkbox"/> If the publication is a general publication, publication of this statement is required. Will be printed in the 10/01/2022 issue of this publication. <input type="checkbox"/> Publication not required.                                                                                                                                                                                                                                                                                |                                                |                                                             |                                                               |
| 18. Signature and Title of Editor, Publisher, Business Manager, or Owner                                                                                                                                                                                                                                                                                                                                                                                                                                                                                                | Title                                          | Date                                                        |                                                               |
| Brian Cole                                                                                                                                                                                                                                                                                                                                                                                                                                                                                                                                                              | Publishing Systems Manager                     | 09/15/2022 08:38:01 AM                                      |                                                               |
| I certify that all information furnished on this form is true and complete. I understand that anyone who furnishes false or misleading information on this form or who omits material or information requested on the form may be subject to criminal sanctions (including fines and imprisonment) and/or civil sanctions (including civil penalties).                                                                                                                                                                                                                  |                                                |                                                             |                                                               |



Searching for  
the perfect  
psychiatric  
career?

## Let APA JobCentral help!

### Manage Your Career

- Browse hundreds of active job listings!
- Create an account to save jobs, store multiple resumes and cover letters and communicate with employers through our internal messaging system.
- Set up multiple job alerts specifying your skills, interests and location to receive e-mails when employers post jobs that match your criteria.

### Recruit for Open Positions

- Post your job in front of thousands of highly qualified psychiatrists.
- Cross promote your job listing in Psychiatric News.
- Search the anonymous resume database to find your ideal candidate.

AMERICAN  
PSYCHIATRIC  
ASSOCIATION

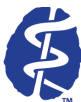

**JOBCENTRAL**  
The Career Hub for Psychiatry

[jobs.psychiatry.org](https://jobs.psychiatry.org)

New!

# Diagnostic and Statistical Manual of Mental Disorders, Fifth Edition, Text Revision (DSM-5-TR™)

American Psychiatric Association

The *Diagnostic and Statistical Manual of Mental Disorders, Fifth Edition, Text Revision (DSM-5-TR)*, is the most comprehensive, current, and critical resource for clinical practice available to today's mental health clinicians and researchers. DSM-5-TR includes the fully revised text and references, updated diagnostic criteria and ICD-10-CM codes since DSM-5 was published in 2013. It features a new disorder, Prolonged Grief Disorder, as well as codes for suicidal behavior available to all clinicians of any discipline without the requirement of any other diagnosis.

With contributions from over 200 subject matter experts, this updated volume boasts the most current text updates based on the scientific literature. Now in four-color and with the ability to authenticate each printed copy, DSM-5-TR provides a cohesive, updated presentation of criteria, diagnostic codes, and text. This latest volume offers a common language for clinicians involved in the diagnosis and study of mental disorders and facilitates an objective assessment

of symptom presentations across a variety of clinical settings—inpatient, outpatient, partial hospital, consultation-liaison, clinical, private practice, and primary care.

2022 • 1,250 pages • ISBN 978-0-89042-575-6 • Hardcover • \$220.00 • Item #2575

2022 • 1,250 pages • ISBN 978-0-89042-576-3 • Paperback • \$170.00 • Item #2576

2022 • 1,250 pages • ISBN 978-0-89042-577-0 • eBook • \$136.00 • Item #2577

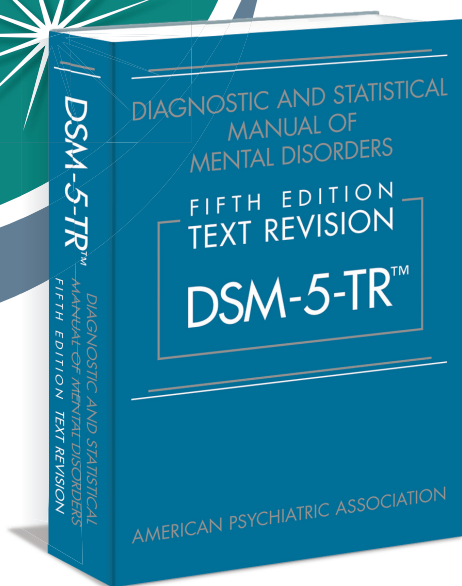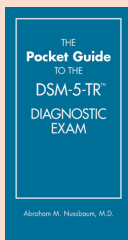

## The Pocket Guide to the DSM-5-TR® Diagnostic Exam

Abraham M. Nussbaum, M.D., M.T.S.

This book is the clinician's companion for using *DSM-5-TR™* in diagnostic interviews. Beginning with an introduction to the diagnostic interview, the *Pocket Guide* addresses the goals of the interview, provides an efficient structure for learning how to conduct one, reviews the screening questions, and then

explains the ways in which *DSM-5-TR™* impacts the interview.

2022 • 298 pages • ISBN 978-1-61537-357-4 • Paperback \$75.00 • Item #37357

2022 • 298 pages • ISBN 978-1-61537-358-1 • eBook \$60.00 • Item #37358

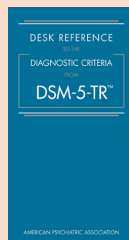

## Desk Reference to the Diagnostic Criteria from DSM-5-TR®

American Psychiatric Association

This handy reference provides quick access to the information essential to making a diagnosis. Designed to supplement *DSM-5-TR™*, this convenient guide will assist all mental health professionals as they integrate the *DSM-5-TR™* diagnostic criteria into their diagnoses.

2022 • 392 pages • ISBN 978-0-89042-579-4 • Paperback \$75.00 • Item #2579

2022 • 392 pages • ISBN 978-0-89042-580-0 • Spiralbound \$75.00 • Item #2580

2022 • 392 pages • ISBN 978-0-89042-581-7 • eBook \$60.00 • Item #2581

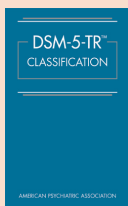

## DSM-5-TR® Classification

American Psychiatric Association

This handy *DSM-5-TR™ Classification* provides a ready reference to the DSM-5-TR classification of disorders, as well as the DSM-5-TR listings of ICD-10-CM codes for all DSM-5-TR diagnoses. To be used in tandem with DSM-5-TR™ or the *Desk Reference to the Diagnostic Criteria From DSM-5-TR™* the *DSM-5-TR™ Classification* makes

accessing the proper diagnostic codes quick and convenient.

2022 • 159 pages • ISBN 978-0-89042-583-1 • Spiralbound \$35.00 • Item #2583

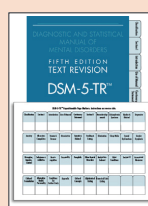

## DSM-5-TR® Repositionable Page Markers

American Psychiatric Association

The *DSM-5-TR™ Repositionable Page Markers* are designed to help you quickly and easily locate key information within DSM-5-TR™. The markers are made with a non-permanent adhesive and may be repositioned within your manual at any time.

2022 • 1 page • ISBN 978-0-89042-582-4  
Repositionable Page Markers • \$12.50 • Item #2582

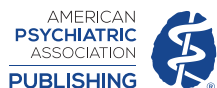

ORDER @ [www.appi.org](http://www.appi.org)  
Email: [appi@psych.org](mailto:appi@psych.org) | Toll Free: 1-800-368-5777

20% Discount for American Psychiatric Association Members  
25% Discount for APA Resident-Fellow Members

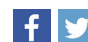

Priority Code AH2202

# PSYCHIATRYonline

Your Destination for Lifelong Learning in Psychiatry

The one-stop resource for information on diagnosis, treatment, guidelines, the latest research, and breaking news from the field.

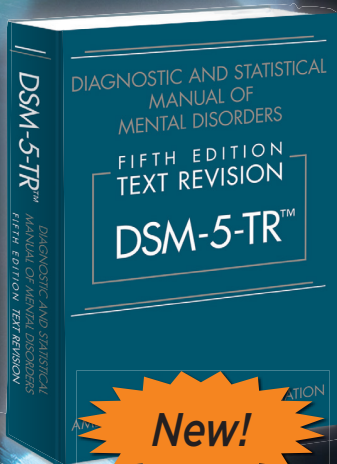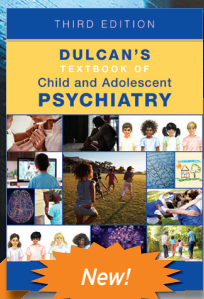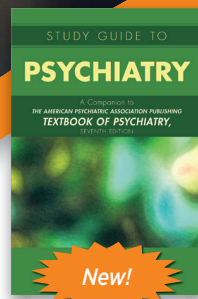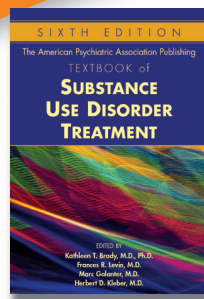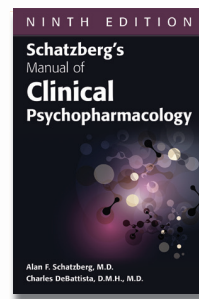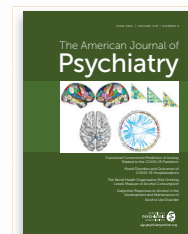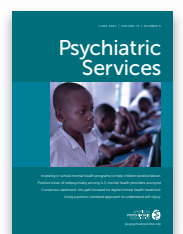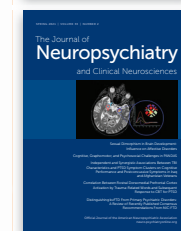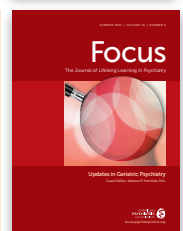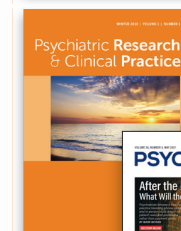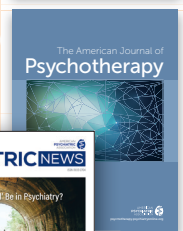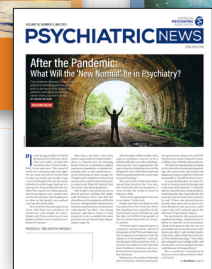

**PsychiatryOnline.org** is the platform for all American Psychiatric Association Publishing journals, *DSM-5-TR™*, and bestselling textbooks, as well as APA Practice Guidelines, and continuing medical education.

This is a one-stop resource for information on psychiatric diagnosis, treatment, guidelines, the latest research, and breaking news from the field. From a single location, users can search across all books and journals to find the most relevant content easier than ever.

Subscribe to products individually or to the DSM Select package that includes the DSM-5® library, books and select journals.

**Go to [www.appi.org](http://www.appi.org) to subscribe.**

*Institutional subscription options are available.*

*For more information contact: [institutions@psych.org](mailto:institutions@psych.org);  
800-368-5777 ext. 3729*

AMERICAN  
PSYCHIATRIC  
ASSOCIATION  
PUBLISHING   
[psychiatryonline.org](http://psychiatryonline.org)

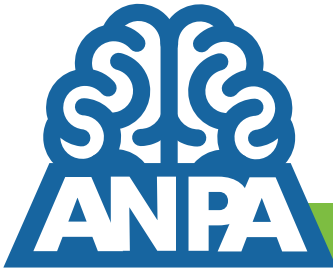

# The American Neuropsychiatric Association

The American Neuropsychiatric Association (ANPA), established in 1988, is an organization of professionals in neuropsychiatry, behavioral neurology, neuropsychology and the clinical neurosciences. Our mission is to improve the lives of people with disorders at the interface of psychiatry and neurology.

Our diverse membership is comprised of professionals in all areas of neuroscience who share clinical and/or academic interests in neuropsychiatry. *The Journal of Neuropsychiatry and Clinical Neurosciences (JNCN)* is the official publication of the organization, and a subscription is a benefit of membership.

ANPA holds an annual scientific meeting that provides the opportunity for attendees to earn continuing education and maintenance of certification credits, as well as the opportunity for collaboration among educators, clinicians, researchers, students and trainees during research presentations, symposia, workshops, and continuing education courses. Members are encouraged to submit their work for presentation at our annual meetings. Travel awards are available for promising trainee clinicians and investigators. Annual meeting abstracts and proceedings are published in *The Journal of Neuropsychiatry and Clinical Neurosciences (JNCN)*, the official publication of the organization.

## Benefits of Membership

- Subscription to *The Journal of Neuropsychiatry and Clinical Neurosciences (JNCN)*
- Discounts on subscriptions to PsychiatryOnline.com including DSM Premium and DSM Premium Plus
- Opportunities for presenting at the annual meeting with accepted abstracts published in the *JNCN*
- Significantly reduced registration fees to the annual meeting
- Discounted membership and meeting registration fees for trainees and students
- Newsletters, news updates, information on job and training opportunities, research and meeting information on the ANPA web site: [www.anpaonline.org](http://www.anpaonline.org)
- Collaboration in clinical, educational and research activities with opportunities to interact with leaders in the field
- Complimentary video recordings of the annual meetings
- Access to educational slide sets assembled by the Education Committee
- Membership in Special Interest Groups (SIGs) designed to draw together ANPA members with similar clinical, research, and academic interests for the purposes of peer discussion, education, and potential collaboration

**Join ANPA now!**

Website: [www.anpaonline.org](http://www.anpaonline.org)

Email: [anpaoffice@gmail.com](mailto:anpaoffice@gmail.com)

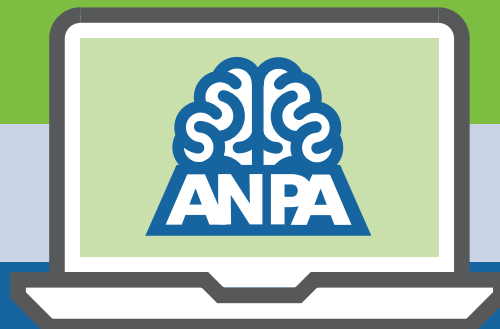

Source: http://neuro.psychiatryonline.org/doi/suppl/10.1176/jnp.2022.34.issue-4/suppl_file/back.pdf
