# NEW RESOURCES ON NEUROPSYCHIATRY

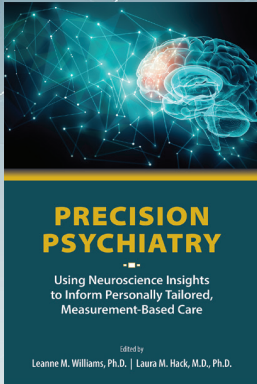

## Precision Psychiatry

Using Neuroscience Insights to Inform Personally Tailored, Measurement-Based Care

Edited by Leanne M. Williams, Ph.D., and Laura M. Hack, M.D., Ph.D.

Precision psychiatry, as outlined in this groundbreaking book, presents a new path forward. By integrating findings from basic and clinical neuroscience, clinical practice, and population-level data, the field seeks to develop therapeutic approaches tailored for specific individuals with a specific constellation of health issues, characteristics, strengths, and symptoms.

2022 • 300 pages • ISBN 978-1-61537-158-7 • Paperback • \$72.00 • Item #37158

2022 • 300 pages • ISBN 978-1-61537-445-8 • eBook • \$58.00 • Item #37445

## Concise Guide to Neuropsychiatry and Behavioral Neurology, Third Edition

Edited by John J. Barry, M.D., Sepideh Bajestan, M.D., Ph.D., Jeffrey L. Cummings, M.D., and Michael R. Trimble, M.D., F.R.C.P., F.R.C.Psych.

This third edition combines all of the scientific rigor of its predecessors with a renewed emphasis on kind, empathetic care. It has been updated to account for the development of new techniques in brain imaging; improvement in electrophysiological methods to better detect epilepsy and sleep disorders; and a growing list of blood and spinal fluid biomarkers that have revolutionized diagnostic capability.

2023 • 416 pages • ISBN 978-1-61537-409-0 • Paperback • \$68.00 • Item #37409

2023 • 416 pages • ISBN 978-1-61537-410-6 • eBook • \$54.00 • Item #37410

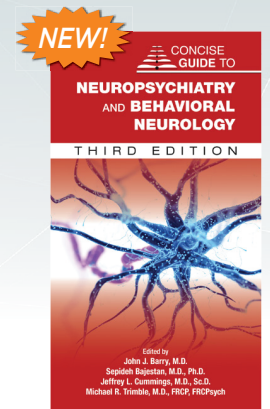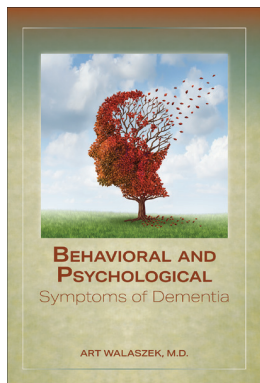

## Behavioral and Psychological Symptoms of Dementia

Art Walaszek, M.D.

The book provides readers with evidence-based, pragmatic, and clear recommendations regarding the care of patients with behavioral and psychological symptoms of dementia.

2020 • 284 pages • ISBN 978-1-61537-168-6 • Paperback • \$65.00 • Item #37168

2020 • 284 pages • ISBN 978-1-61537-267-6 • eBook • \$52.00 • Item #37267

## Brain Stimulation Therapies for Clinicians, Second Edition

Edmund S. Higgins, M.D., and Mark S. George, M.D.

A comprehensive survey of the state of current practice, this new edition provides thoroughly updated information on the growing list of electrical stimulation therapies now in use or under study.

2020 • 197 pages • ISBN 978-1-61537-167-9 • Hardcover • \$72.00 • Item #37167

2020 • 197 pages • ISBN 978-1-61537-270-6 • eBook • \$58.00 • Item #37270

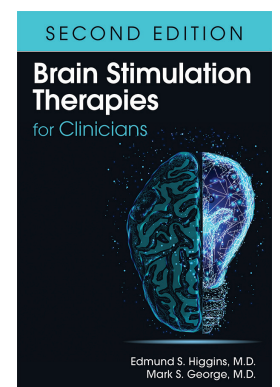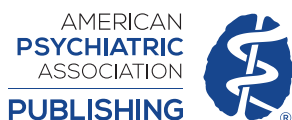

ORDER @ [www.appi.org](http://www.appi.org) | Email: [appi@psych.org](mailto:appi@psych.org) | Toll Free: 1-800-368-5777

20% Discount for American Psychiatric Association Members

25% Discount for APA Resident-Fellow Members

Follow us on  and 

AH2227

# ▶ PODCASTS from APA Publishing

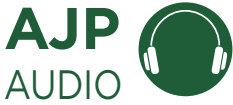

## AJP Audio

Host: Aaron van Dorn

Each episode features an in-depth interview with authors featured in that month's issue of *The American Journal of Psychiatry*.

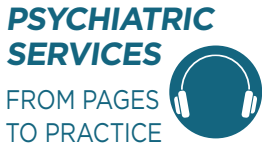

## Psychiatric Services From Pages to Practice

Hosts: Lisa Dixon, M.D., M.P.H., Editor, *Psychiatric Services*, and Josh Berezin, M.D., M.S.

Learn about the latest mental health services research published in *Psychiatric Services* and why it is relevant. Topics include community-based treatment programs, collaborative care, evidence-based treatment and service delivery, criminal and social justice, policy analysis, and more.

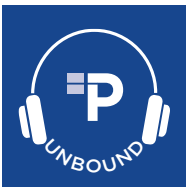

## Psychiatry Unbound

Host: Laura Roberts, M.D., M.A., Editor-in-Chief, APA Publishing Books

APA Publishing's Books podcast offers the opportunity to hear the voices behind the most prominent psychiatric scholarship in the field today. Learn about important topics in the field of psychiatry and see how our authors are making an impact in clinical settings throughout the world.

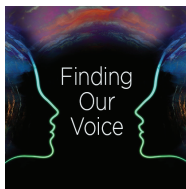

## Finding Our Voice

Host: Sanya Virani, MBBS, MPH

*Finding Our Voice* brings the viewpoints and opinions of the next generation of psychiatrists—including residents, fellows, and early career psychiatrists—to the forefront. Topics covered include systemic racism and social determinants.

Subscribe Today!

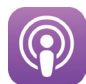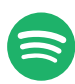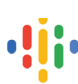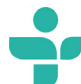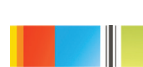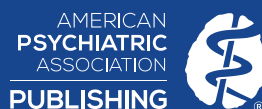

Source: http://neuro.psychiatryonline.org/doi/suppl/10.1176/jnp.2022.34.issue-4/suppl_file/front.pdf
