FALL 2022 | VOLUME 34 | NUMBER 4

The Journal of  
**Neuropsychiatry**  
and Clinical Neurosciences

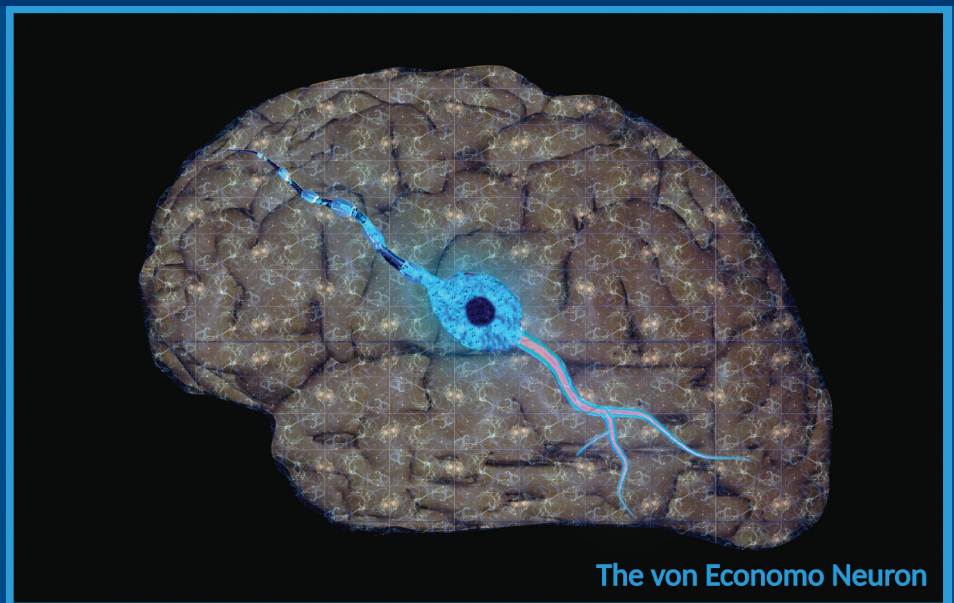

Advances in Treatment of Frontotemporal Dementia

Comparing Detection of Alzheimer's and Vascular Disease–Related  
Cognitive Impairment With Brief Cognitive Screens

Prevalence and Correlates of Depressive Symptoms Within  
6 Months After First-Time Mild Traumatic Brain Injury

Clinical Neuroimaging Findings in Catatonia: Neuroradiological  
Reports of MRI Scans of Psychiatric Inpatients  
With and Without Catatonia

Neuropsychiatry's Role in the Postacute Sequelae of COVID-19:  
Report From the ANPA Committee on Research

Official Journal of the American Neuropsychiatric Association  
[neuro.psychiatryonline.org](http://neuro.psychiatryonline.org)
